# Supplementary material for: Molecular Profiling reveals Tumor Immune Microenvironment Heterogeneity of Concurrent Lung Adenocarcinoma and Squamous Cell Carcinoma in Multiple Primary Lung Cancers
Source: Research Square preprint supplement (doi:10.21203/rs.3.rs-3075414/v1), 2023-06-29
Supplement: Supplementary file 1 [file 9cb00c3229accc78aef01dfc.docx]

**CNV landscape of adenocarcinoma (ADC) and squamous cell carcinoma (SQCC) lesions**

CNVs (copy number variants) refer to changes in the number of copies of a region on a chromosome. Figure S1 shows the CNV landscape of ADC and SQCC patients. The genes with the most significant copy number changes in the ADC group were *CELF4*, *GUSBP16*, *CGB7*, *EGFL7*, *NEU4*, *GUSBP16*, *LOC101929599*, *GUSBP3*, *GUSBP15*, *GUSBP17*, *KLC3*, *GUSBP3* (Figure S1A, mutation frequency = 40%), and *LMNTD2*, *DUSP8* and *LIX1* (Figure S1B, mutation frequency = 60%) in SQCC group, respectively.

**
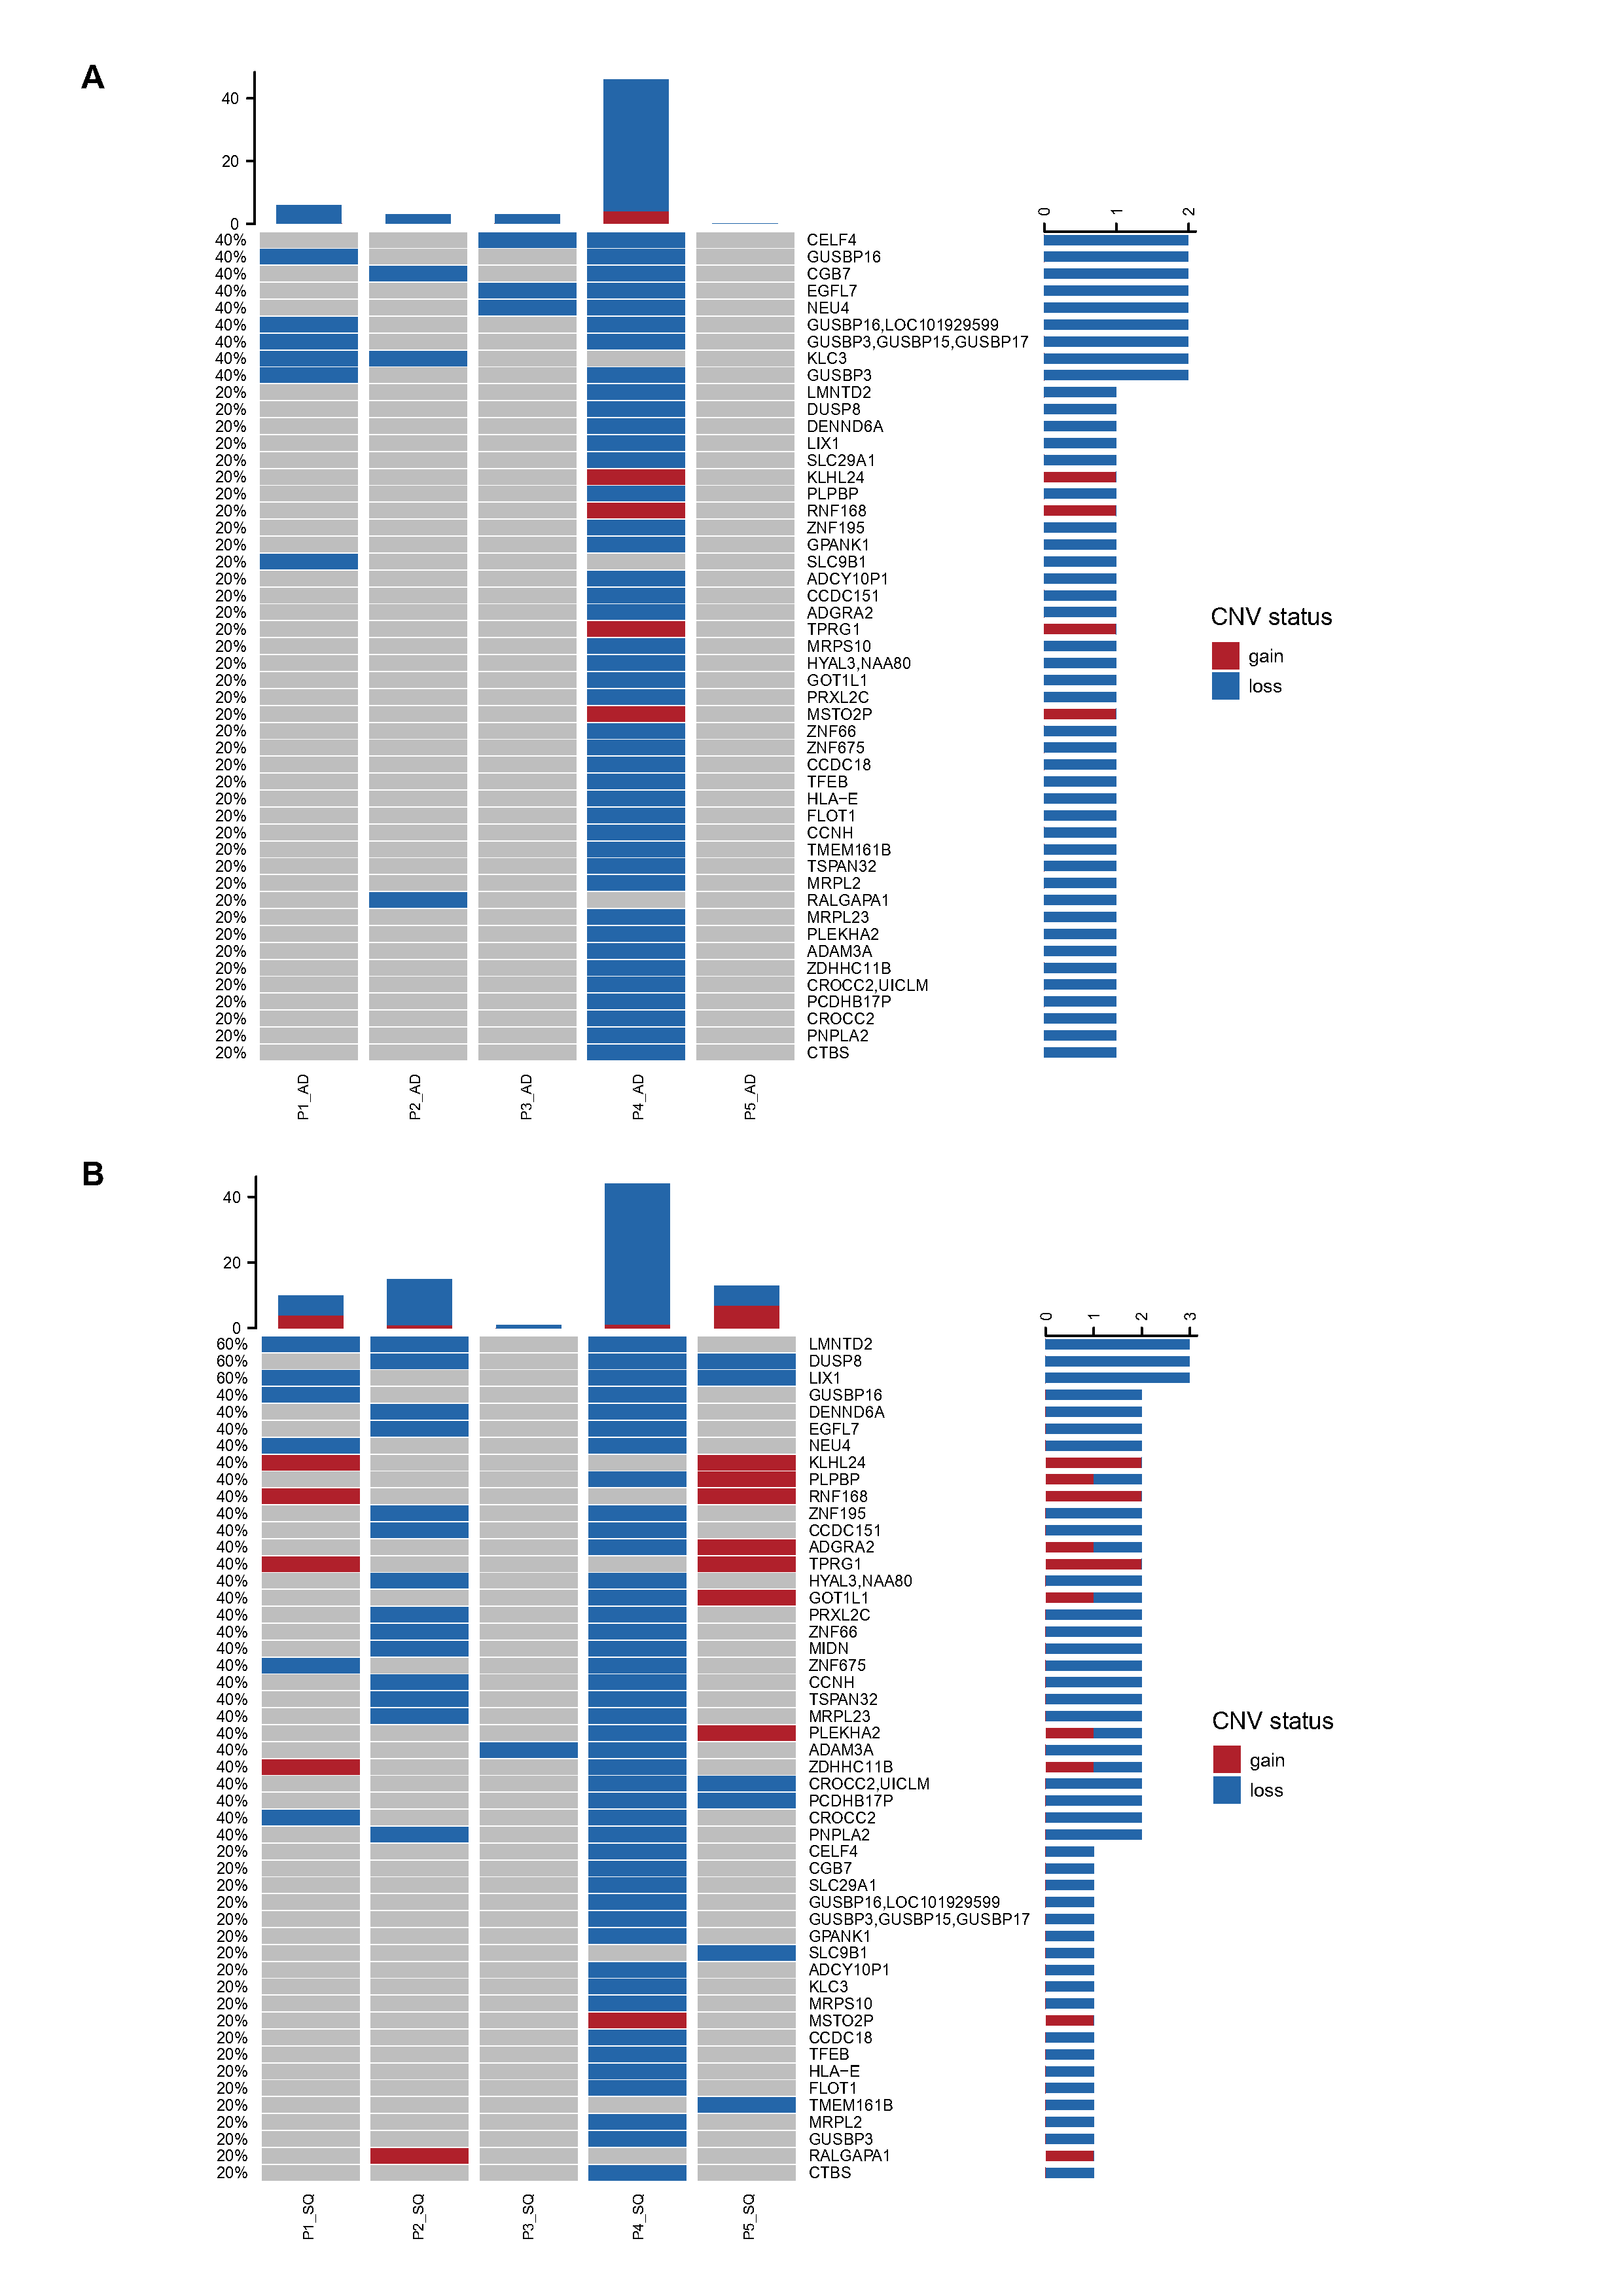
**

**Figure S1. CNV landscape of ADC and SQCC lesions.**

A, CNV landscape of 5 lesions in ADC group; B, CNV landscape of 5 lesions in SQCC group.

**Exhausted CD8+ T cell-associated genes expression between MPLC ADC and SQCC lesions**

In cancer, depleted CD8+ is hyporesponsive to tumor cells[1]. We analyzed the markers and suppressors expression associated with depleted CD8+ T cells between SQCC and ADC lesions[2]. The analysis showed (Figure S2A) that the overall trend of depleted CD8+ T cell-related marker expression was more obvious in the ADC group; the analysis of specific group differences (Figure S2B) showed that in the ADC group CD244 (*p* = 0.094), PTGER4 (Prostaglandin E 2 receptor 4) (*p* = 0.338), PDCD1 (PD-1) (*p* = 0.105), CD274 (PD-L1) (*p* = 0.096), EOMES (Eomesodermin) (*p* = 0.108), and LAG3 (Lymphocyte activation gene 3) (*p* = 0.161) were higher than those in the SQCC group, but the differences were not significant (*p* > 0.05). This suggests that the abundance of depleted CD8+ T cells and their depletion may be higher in ADC than in SQCC, thus ADC may be more likely to benefit from immune checkpoint inhibitor therapy.


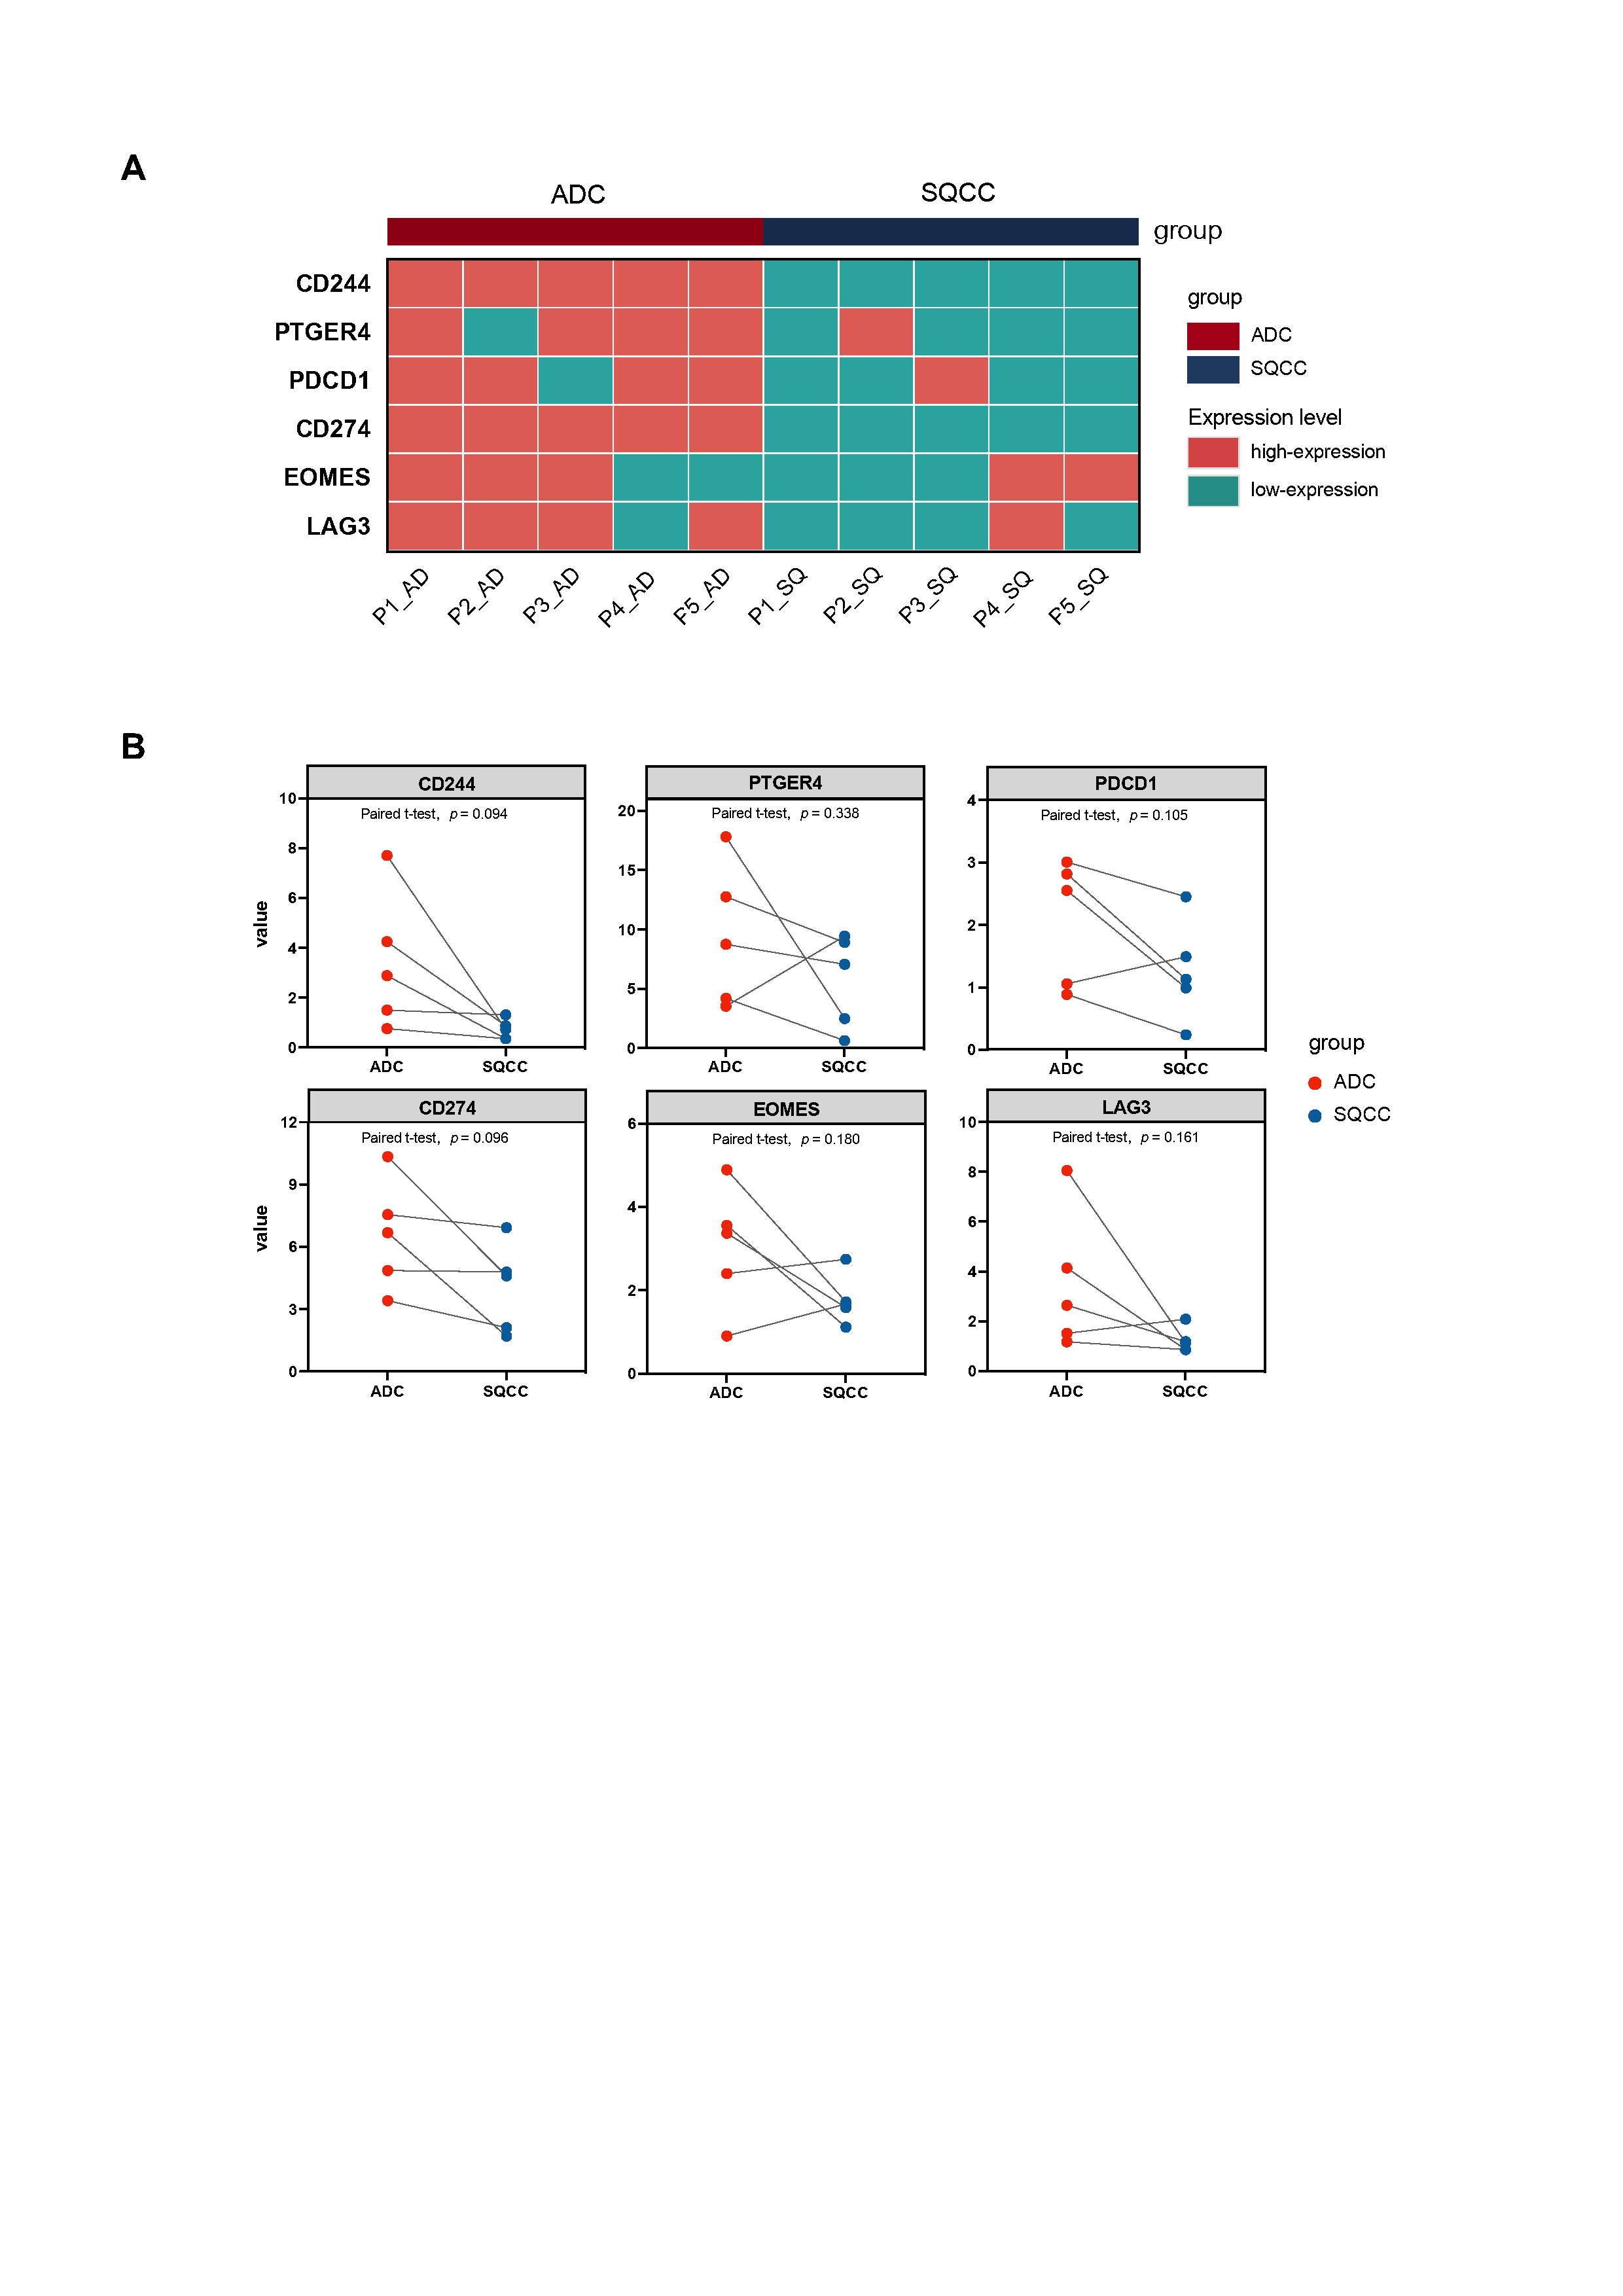


**Figure S2. Expression analysis of exhausted CD8+ T cell-associated genes between groups of MPLC ADC and SQCC lesions.**

A, heat map of exhausted CD8+ T cell-associated genes expression between two groups; B, paired scatter-link plot of CD244, PTGER4 (Prostaglandin E 2 receptor 4), PDCD1 (PD-1), CD274 (PD-L1), EOMES (Eomesodermin), and LAG3 (Lymphocyte activation gene 3) expression between two groups.

**References:**

1 Budimir, N., Thomas, G. D., Dolina, J. S. & Salek-Ardakani, S., Reversing T-cell Exhaustion in Cancer: Lessons Learned from PD-1/PD-L1 Immune Checkpoint Blockade. *CANCER IMMUNOL RES* **10** 146 (2022).

2 Hsu, C. L. *et al.*, Exploring Markers of Exhausted CD8 T Cells to Predict Response to Immune Checkpoint Inhibitor Therapy for Hepatocellular Carcinoma. *Liver Cancer* **10** 346 (2021).
